# Supplementary material
Source: publisher figshare collection journal article supplement (https://acs.figshare.com/ndownloader/files/4003132)
Supplement: Supplementary file 1 [file 4003132]

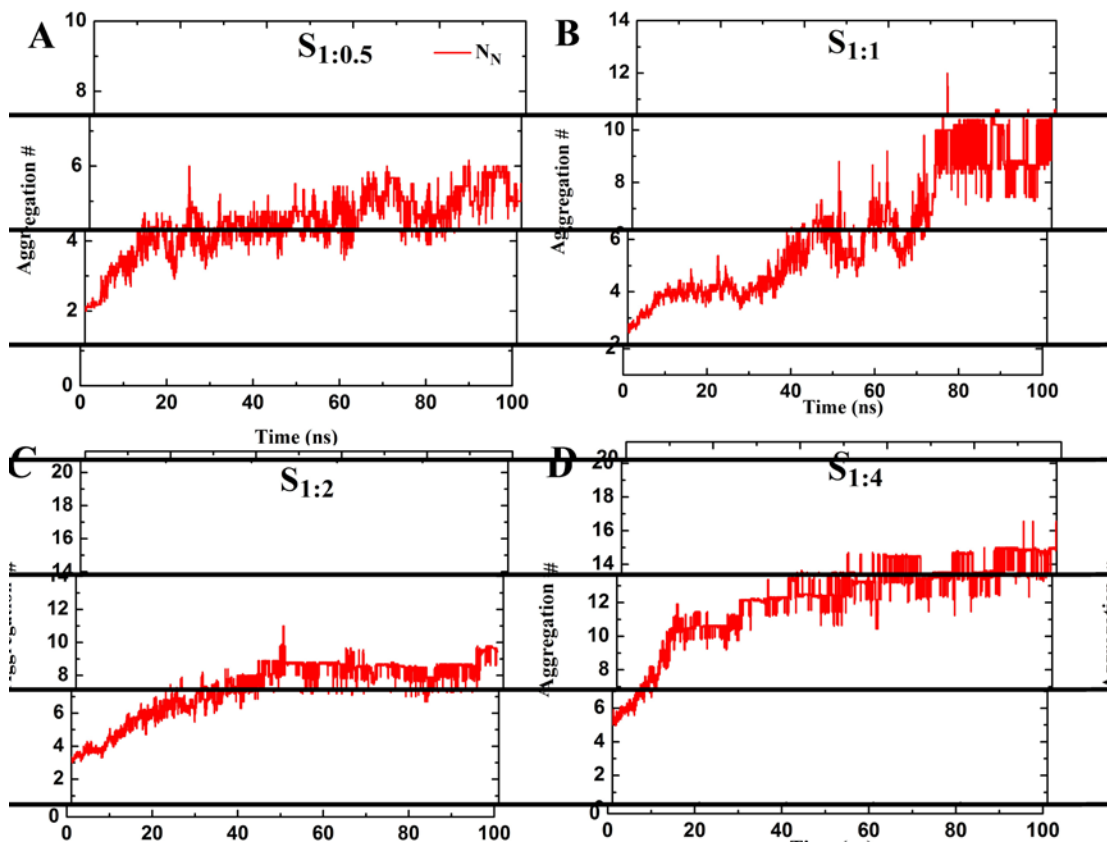

**Figure S1:** Time evolution of the number averaged aggregation number ( $N_N$ ) for binary mixture simulations with 1:0.5 (A), 1:1 (B), 1:2 (C) and 1:4 (D) CA:Indo molar ratios.

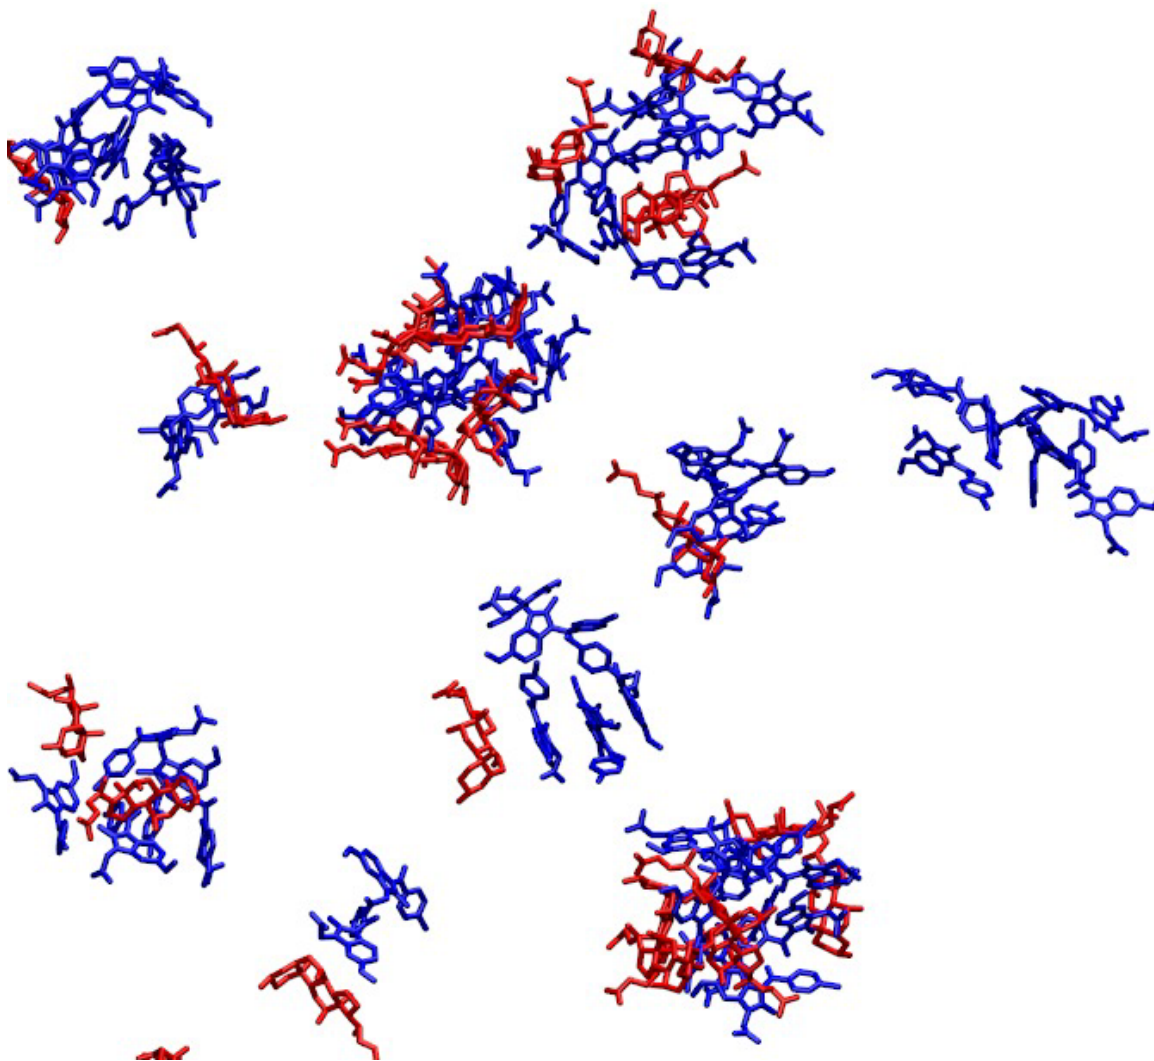

**Figure S2:** Snapshot of a typical CA-Indo mixed micelle formed at 100ns from simulation  $S_C$ . CA in red and Indo in blue.

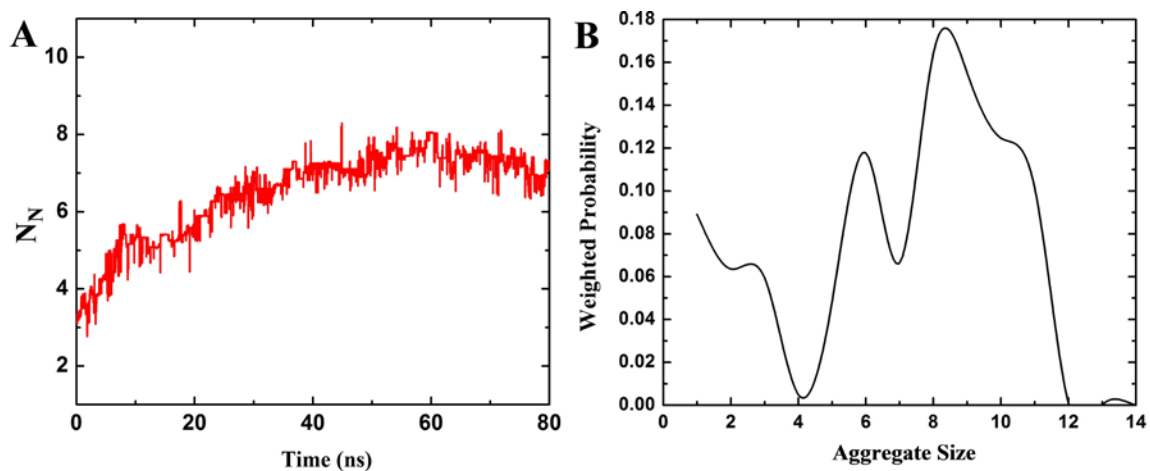

**Figure S3:** (A) Time evolution of the number averaged aggregation number ( $N_N$ ) and (B) weighted probability distribution of Indo aggregates derived from a simulation of Indo in the pure phase.

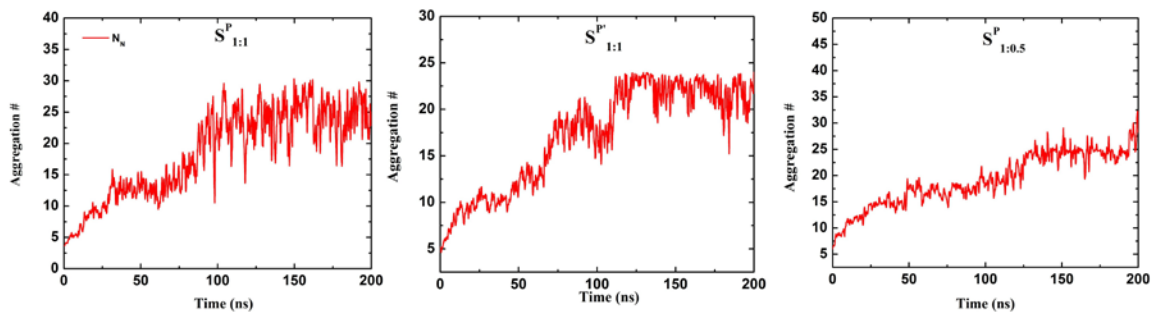

**Figure S4:**  $N_N$  of CA/Indo/POPC aggregates in ternary mixtures from simulations  $S_{1:1}^P$ ,  $S_{1:1}^{P'}$  and  $S_{1:0.5}^P$ .

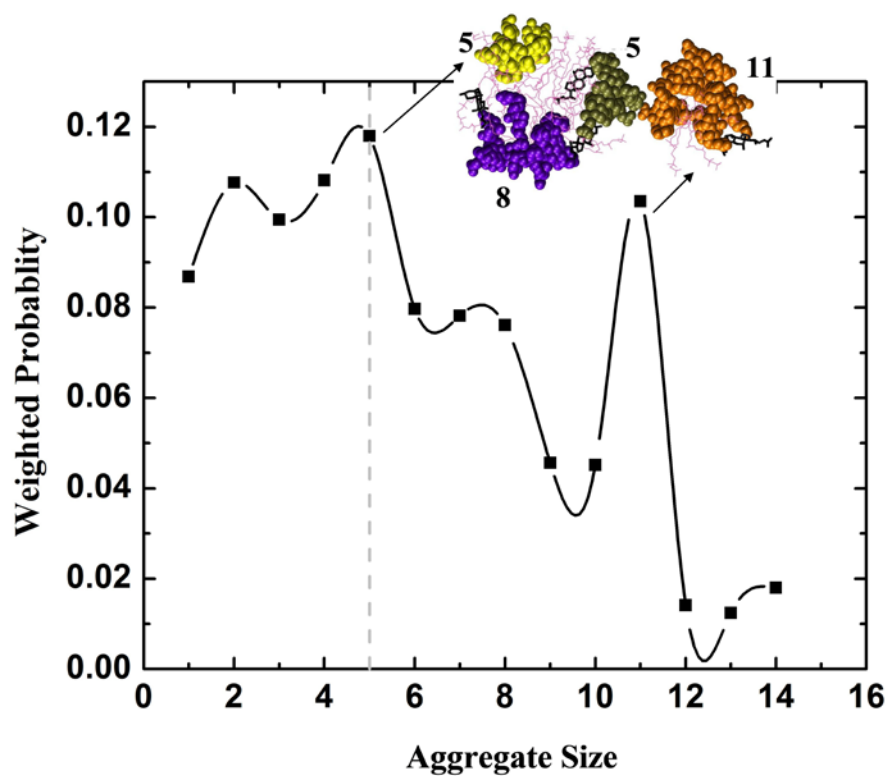

**Figure S5:** Weighted probability distribution of pure-CA micelles from CA/POPC 2:1 binary simulation. Last 30ns of the data was used for this analysis. Small pure-CA aggregates of size 5 (ochre and yellow) and 8 (purple) are observed. The aggregate of size 11 (orange) contains very few POPC molecules which may eventually fuse with the larger CA/POPC mixed micelle. The POPC is shown in magenta lines. The gray dotted line shows the maximum pure-CA aggregate size.

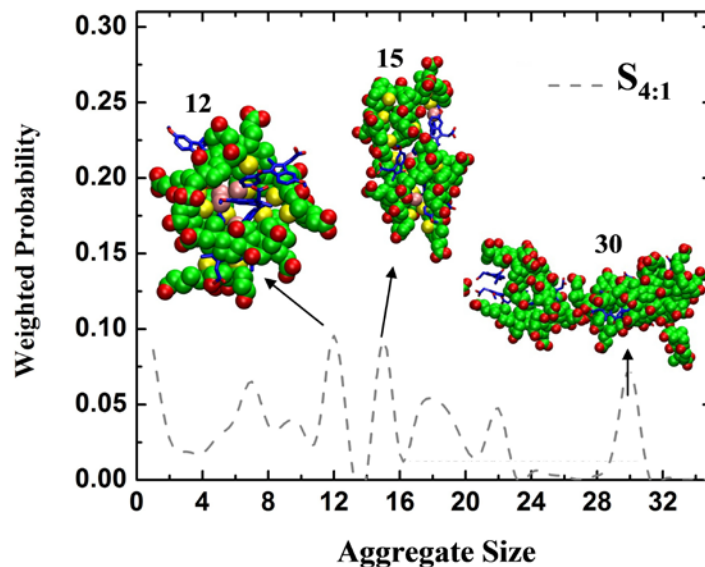

**Figure S6:** Weighted probability distribution of the number of CA/Indo micelles (grey dotted lines) from simulation  $S_{4:1}$ . The color scheme is the same as in Figure 5 (main text). Here the concentration of CA was four-times that of Indo. This simulation yielded  $N_W = 14.6 \pm 2.1$ , a value very similar to that in which the concentration of Indo was higher (ca. simulations  $S_{1:2}$  and  $S_{1:4}$ ). The smaller aggregates are unstable ( $< 10\%$  occurrence). Also, the appearance of a secondary micelle made up of two primary micelles of size 15 is a unique feature of simulation  $S_{4:1}$ .

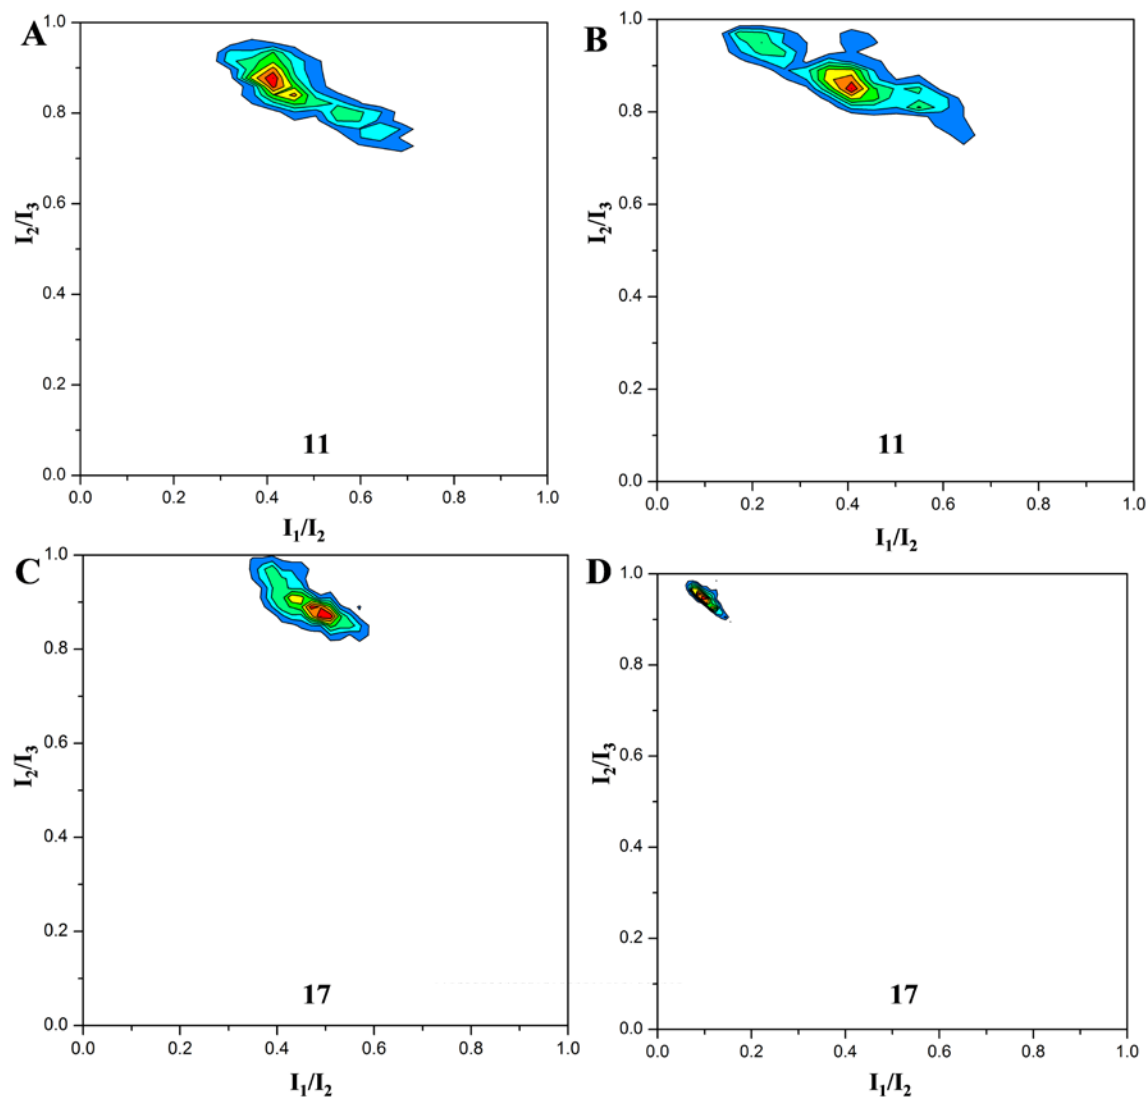

**Figure S7:** Bivariate distributions of the ratio of principal moments of inertia for aggregate size 11 and 17 from simulation  $S_{1:2}$  (A) and (C), and  $S_{1:4}$  (B) and (D). The distribution is calculated from the last 10ns of the simulation when the reorganization of mixed micelles is considered to be complete. Red is most populated.

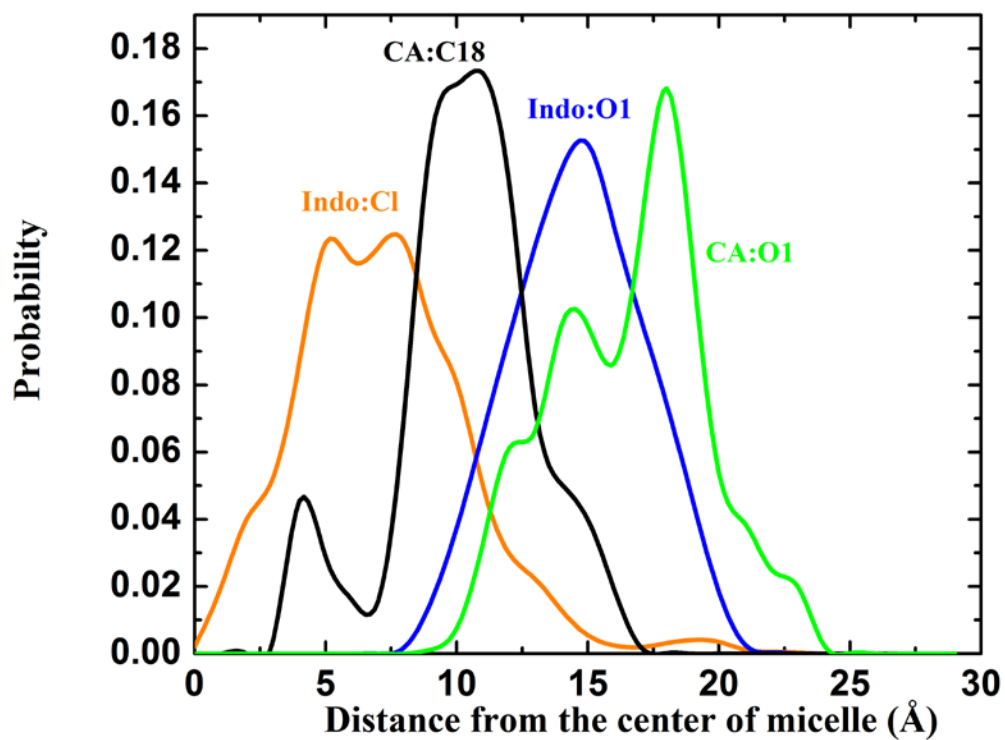

**Figure S8:** Distribution of selected atoms from the center of mass of a mixed micelle of size 25 from simulation  $S_{1:4}$ . The distribution is calculated for the last 10ns. Refer to Figure 1 (main text) for atom numbering.
